# Supplementary material for: A Polyelectrolyte Colloidal Brush Based on Cellulose: Perspectives for Future Applications
Source: MDPI journal article supplement (doi:10.3390/polym15234526), 2023-11-25
Supplement: s1 [file s1]

ELECTRONIC SUPPLEMENTARY INFORMATION FOR

# A Polyelectrolyte Colloidal Brush Based on Cellulose: Perspectives for Future Applications

Michael A. Smirnov<sup>1,\*</sup>, Vitaly K. Vorobiov<sup>1</sup>, Veronika S. Fedotova<sup>1</sup>, Maria P. Sokolova<sup>1</sup>, Natalya V. Bobrova<sup>1</sup>, Nikolay N. Smirnov<sup>1</sup> and Oleg V. Borisov<sup>1,2,\*</sup>

<sup>1</sup> Institute of Macromolecular Compounds, Russian Academy of Sciences, V.O. Bolshoi Pr. 31, 199004 St. Petersburg, Russia; vrbvrbvrb@mail.ru (V.K.V.), fedotova.veronicka2016@yandex.ru (V.S.F.), pmarip@mail.ru (M.P.S.), natalia.bobrova.60@mail.ru (B.N.V.), rambow@inbox.ru (N.N.S);

<sup>2</sup> Institut des Sciences Analytiques et de Physico-Chimie pour l'Environnement et les Matériaux (IPREM), UMR 5254 CNRS/UPPA, 64053 Pau, France.

\* Correspondence: smirnov\_michael@mail.ru (M.A.S.), oleg.borisov@univ-pau.fr (O.V.B.).

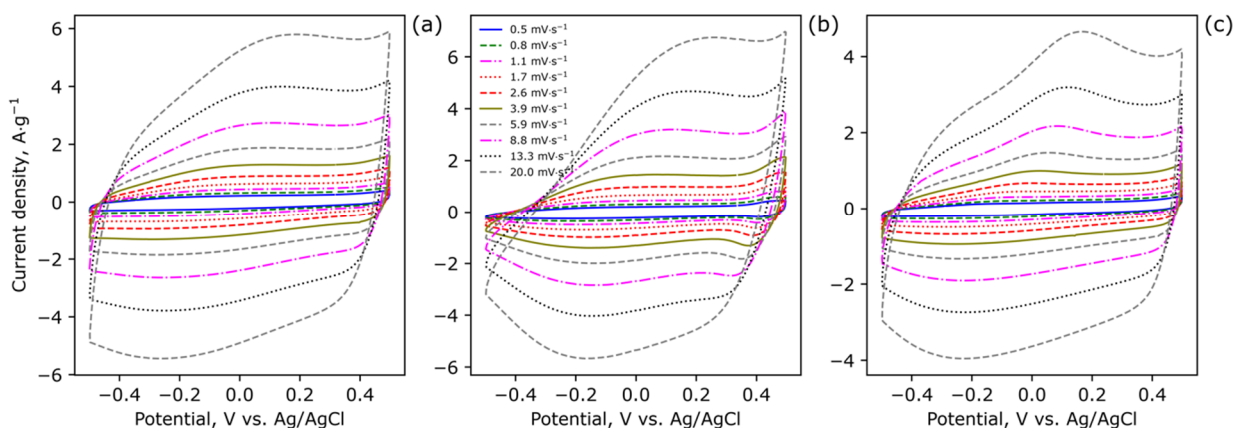

**Figure S1.** Cyclic voltammetry curves for CNF/PPy (a) and CNF-PAA/PPy (b) electrodes synthesized using FeCl<sub>3</sub> as an initiator and CNF-PAA/PPy electrode synthesized using (NH<sub>4</sub>)<sub>2</sub>S<sub>2</sub>O<sub>8</sub> at different scan rates (c).
